# Supplementary material for: Tropospheric aerosols over the western North Atlantic Ocean during the winter and summer deployments of ACTIVATE 2020: life cycle, transport, and distribution
Source: Copernicus journal article supplement (doi:10.5194/acp-25-2087-2025), 2025-02-19
Supplement: Supplementary file 1 [file acp-25-2087-2025-supplement.pdf]

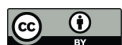

*Supplement of*

## **Tropospheric aerosols over the western North Atlantic Ocean during the winter and summer deployments of ACTIVATE 2020: life cycle, transport, and distribution**

**Hongyu Liu et al.**

*Correspondence to:* Hongyu Liu ([hongyu.liu-1@nasa.gov](mailto:hongyu.liu-1@nasa.gov)) and Bo Zhang ([bo.zhang@nasa.gov](mailto:bo.zhang@nasa.gov))

The copyright of individual parts of the supplement might differ from the article licence.

## 1 **Section S1: Anthropogenic, biogenic, marine DMS, and lightning NO<sub>x</sub> emissions in GEOS-Chem**

2 Global anthropogenic emissions are based on the EDGAR v4.2 emissions inventory for 2008. We use the 2011  
3 EPA National Emissions Inventory (NEI11) emissions as implemented by Travis et al. (2016) over the U.S. with  
4 national annual scaling factor updated for 2018 (Yu et al., 2018), CAC emissions inventory over Canada, BRAVO  
5 emissions inventory over Mexico, EMEP emissions inventory over Europe, and the MIX emissions inventory (for  
6 year 2010) over China (Li et al., 2014). Shipping emissions are from the EMEP inventory (Vestreng et al., 2007).  
7 Aircraft emissions are from the AEIC inventory for 2005 (Stettler et al., 2011). The NEI11 emissions inventory  
8 contains biofuel emissions. Biogenic emissions are calculated online using the MEGAN model (Guenther et al., 2012).  
9 Marine DMS emissions are calculated as a product of the climatological monthly mean surface seawater DMS  
10 concentration (Lana et al., 2011) and sea-to-air transfer velocity, as implemented by Breider et al. (2017). Lightning  
11 NO<sub>x</sub> emissions are constrained by the Lightning Imaging Sensor and the Optical Transient Detector (LIS/OTD)  
12 climatological observations of lightning flashes, as described by Murray et al. (2012).

## 13 **Section S2: Surface aerosol observations, MODIS AOD, and CALIPSO data quality screening**

14 **CSN, IMPROVE, and NADP.** Surface aerosol composition (SO<sub>4</sub><sup>2-</sup>, NO<sub>3</sub><sup>-</sup>, NH<sub>4</sub><sup>+</sup>) data for the eastern U.S. were  
15 obtained from the Chemical Speciation Network (CSN) and the Interagency Monitoring of Protected Visual  
16 Environments (IMPROVE) network (Solomon et al., 2014; Malm et al., 1994). IMPROVE does not include NH<sub>4</sub><sup>+</sup>  
17 measurements. Daily observational data for 2020 were obtained from the Federal Land Manager Environmental  
18 Database at the Cooperative Institute for Research in the Atmosphere (CIRA), Colorado State University  
19 (<https://views.cira.colostate.edu/fed/>; last access on 31 July 2022). The readers are referred to that website for methods  
20 of chemical characterization, uncertainties, detection limits, and data downloading. Aerosol wet deposition  
21 composition (SO<sub>4</sub><sup>2-</sup>, NO<sub>3</sub><sup>-</sup>, NH<sub>4</sub><sup>+</sup>) data from the ensemble of eastern U.S. sites are from the National Trends Network  
22 (NTN) of the U.S. National Atmospheric Deposition Program (NADP, <https://nadp.slh.wisc.edu/>). The NTN measures  
23 total weekly wet deposition of SO<sub>4</sub><sup>2-</sup>, NH<sub>4</sub><sup>+</sup>, and NO<sub>3</sub><sup>-</sup> and we use monthly mean data downloaded from  
24 <http://views.cira.colostate.edu/fed/>. Since the NTN wet deposition of SO<sub>4</sub><sup>2-</sup> includes contribution from SO<sub>4</sub><sup>2-</sup> resulting  
25 from oxidation of SO<sub>2</sub> in rainwater, for comparison with NTN measurements we calculate the model sulfur wet  
26 deposition fluxes as the sum of the SO<sub>4</sub><sup>2-</sup> wet deposition flux and 150% (based on the ratio of the molar masses of SO<sub>2</sub>  
27 and SO<sub>4</sub><sup>2-</sup>) of the model estimated SO<sub>2</sub> wet deposition (Appel et al., 2011). Similarly, the model estimates of NO<sub>3</sub><sup>-</sup>  
28 (NH<sub>4</sub><sup>+</sup>) wet deposition include 98.4% (106%) of the model estimates of HNO<sub>3</sub> (NH<sub>3</sub>) wet deposition. Gartman (2017)  
29 described the analysis and quality assurance of the NADP data. The IMPROVE and NADP data sets were previously  
30 used by Corral et al. (2020, 2021) to analyze aerosols and wet deposition chemistry over the U.S. East Coast.

31 **MODIS.** Satellite retrieved products of AODs are available from the Moderate Resolution Imaging  
32 Spectroradiometer (MODIS) on Aqua. MODIS has a ~2330 km swath and provides nearly global coverage daily. We  
33 use the MODIS/Aqua Level 3 daily (MYD08\_D3) AOD product at 550 nm and 1°×1° horizontal resolution (Collection  
34 6.1; scientific data set or SDS named “Aerosol\_Optical\_Depth\_Land\_Ocean\_Mean”) from the Dark Target (DT)  
35 retrieval algorithm (Sayer et al., 2014; Levy et al., 2013; Hubanks et al., 2019). This SDS contains only AOD values  
36 for any DT-ocean retrieval having the Quality Assurance Confidence (QAC) >=1 and any DT-land retrievals having  
37

38 QAC=2 (good confidence) or 3 (high confidence) (Levy et al., 2013; R.C. Levy, personal communication, 2019).  
39 Collection 6.1 data are available from <https://ladsweb.modaps.eosdis.nasa.gov/search/>.

40 **CALIPSO.** The data averaging approach used to generate the CALIPSO version 4 Level 3 aerosol products are  
41 used in this study (Tackett et al., 2018). The following quality screening and data selection techniques are applied:

42 1) When creating the averaged profiles used in this work, CALIOP Level 2 range bins in “clear air” regions  
43 where no aerosol is detected are typically assigned aerosol extinction coefficients of  $0 \text{ km}^{-1}$ . An exception to this  
44 convention is exercised for regions of “clear air” lying below aerosol layers with base heights lower than 250 m.  
45 Because we assume the atmosphere is well mixed below 250 m, excluding these bins avoids introducing low biases  
46 near the Earth’s surface.

47 2) Aerosol layers detected at 80 km horizontal resolution that are not vertically or horizontally adjacent to another  
48 aerosol layer detected at finer spatial resolutions (i.e., 5 km or 20 km) are assumed to be noise-induced false positive  
49 detections, and hence are discarded.

50 3) Layers classified as aerosols that are detected at 80 km horizontal resolution with base altitudes above 4 km  
51 and are in contact with ice clouds are assumed to be misclassified cirrus “fringes” (Liu et al., 2019), and are also  
52 discarded.

53 4) Aerosol samples in the surface-attached opaque layer (beneath the maximum surface elevation), for which  
54 the extinction is greater than  $2 \text{ km}^{-1}$  and at least 10 times higher than the extinction of the layer above, are rejected to  
55 avoid surface contamination.

56 5) In any 5-km profile in the CALIOP Level 2 data product, range bins identified as aerosol that have embedded  
57 cloud fractions greater than 97% are rejected, as are all samples at lower altitudes in the profile. Rejecting these  
58 samples reduces the likelihood of cloud contamination.

59 The details of the quality screening to generate the Level 3 aerosol profile product are described in Winker et al.  
60 (2013), Tackett et al. (2018), and the CALIPSO Data Users’ Guide ([https://www-  
61 calipso.larc.nasa.gov/resources/calipso\\_users\\_guide/](https://www-calipso.larc.nasa.gov/resources/calipso_users_guide/)).

### 63 **Section S3: Model evaluation with surface aerosol concentrations, deposition fluxes, and MODIS AOD** 64 **observations**

65 In this section we evaluate model simulations with surface aerosol concentration observations from the  
66 IMPROVE and CSN networks, aerosol deposition flux measurements from the NTN network of NADP, and satellite  
67 AOD measurements from MODIS/Aqua, with a focus on the eastern U.S. coastal region or WNAO.

68 **Aerosol surface concentrations.** For comparison with model SNA surface concentrations, we use the  
69 IMPROVE/CSN observations obtained at 59 eastern U.S. sites (in the states of NY, CT, VA, MA, ME, GA, PA, DC,  
70 FL, NC, and SC), which are located upwind of the ACTIVATE flight area. **Fig. S1** shows the scatterplots of  
71 IMPROVE/CSN daily surface concentrations of SNA aerosols versus corresponding model results at each of the  
72 selected sites for Feb.-Mar. (upper panels) and Aug.-Sep. (lower panels), respectively, 2020. The model results from  
73 both “standard” (blue triangles and lines) and “fixedCWC” (red triangles and lines) experiments (also see **Table 1**)  
74 are shown to help understand the impact of using MERRA-2 CWC on simulated aerosols in GEOS-Chem. Model

75 daily output was sampled at the day, location, and site elevation for each data sample. In Feb.-Mar., for sulfate the  
76 standard model with MERRA-2 CWC has a small overall bias (0.6%) relative to the observations, with a reduced-  
77 major-axis (RMA) regression slope of 0.80 and a correlation coefficient (R) value of 0.46. The fixedCWC simulation  
78 yields a better regression slope (0.98) but a much larger overall bias. The standard model overestimates nitrate and  
79 ammonium substantially with an average positive bias of 198.5% and 230.3%, respectively. These biases in fixedCWC  
80 are even higher. Using MERRA-2 CWC in the stratiform precipitation scavenging in the standard model is expected  
81 to reduce existing large positive biases in surface nitrate and ammonium concentrations as demonstrated by Luo et al.  
82 (2019, 2020). Our results here also show that using spatiotemporally varying CWC from MERRA-2 slightly expedites  
83 aerosol scavenging and thus improves simulated aerosol concentrations. The improvement in our analysis is, however,  
84 very limited. In Aug.-Sep., the standard model largely overestimates surface concentrations of sulfate (61.2% bias),  
85 nitrate (97.4% bias), and ammonium (249.9% bias). Using MERRA-2 CWC has slightly reduced the model bias in  
86 surface sulfate concentrations but increased the model biases in surface nitrate and ammonium concentrations. The  
87 latter is inconsistent with Luo et al. (2020) probably due to not having fully implemented their modifications to sulfate  
88 scavenging, which affects nitrate and ammonium through the SNA aerosol chemical dynamics. This also suggests that  
89 the impact of individual modifications to SNA wet scavenging should be investigated separately because feedback  
90 from complicated chemical dynamics is always involved.

91 **Aerosol wet deposition fluxes.** For comparison with model SNA wet deposition fluxes, we use the NADP  
92 observations obtained at over 100 eastern U.S. sites (in the same states as for surface aerosol concentrations above).  
93 **Fig. S2** shows the scatterplots of model monthly mean wet deposition fluxes of sulfate + SO<sub>2</sub>, nitrate + nitric acid  
94 (HNO<sub>3</sub>), and ammonium + ammonia (NH<sub>3</sub>) versus those from NADP for Feb.-Mar. and Aug.-Sep. 2020. The observed  
95 sulfur deposition fluxes are mostly < 1.0 kg per ha per 30 days and did not change significantly from winter to summer.  
96 In both seasons, the standard model with MERRA-2 CWC overestimates sulfate wet deposition fluxes (~57.9% bias  
97 in winter and ~44.2% bias in summer), while the fixedCWC simulation results in reduced biases (~18.4% in winter  
98 and 31.8% in summer). Correlation between either of the two simulations and observations is not strong (R<0.5),  
99 suggesting that further improvement is required for sulfate scavenging. Observed wet deposition fluxes of nitrate tend  
100 to decrease from winter to summer, presumably because of lower concentrations in summer (**Fig. S1**). In the  
101 wintertime, both the standard and fixedCWC simulations overestimate nitrate deposition fluxes. The fact that model  
102 simulations show large positive biases in both surface concentrations and deposition fluxes suggests that there is too  
103 much nitrate mass in the model and/or nitrate is scavenged too fast at higher altitudes followed by partial release into  
104 the air due to rainwater evaporation close to the surface. Compared to the fixedCWC simulation, the standard  
105 simulation shows larger nitrate deposition flux overestimates due to faster scavenging with MERRA-2 CWC (Luo et  
106 al., 2019). The observed ammonium wet deposition fluxes exhibit larger variability among all sites in summer relative  
107 to winter. The fixedCWC simulation tends to underestimate ammonium deposition fluxes and shows values of similar  
108 magnitude in the two seasons. The standard simulation with MERRA-2 CWC overcorrects this underestimate in winter  
109 due to enhanced stratiform precipitation scavenging of ammonium, resulting in an overall positive bias of 46.1%. Such  
110 effects are not seen for summertime ammonium likely because of the increased role of convective scavenging in  
111 summer.

112 **MODIS AOD.** We compare model simulated AOD with MODIS observations with respect to the spatial  
113 distribution of monthly mean AODs along with speciated AODs suggested by the model. **Fig. S3** shows model  
114 monthly mean AODs in comparison with MODIS/Aqua retrievals (at 550 nm) over North America and the North  
115 Atlantic for the months of Feb. and Mar., respectively, 2020. Model output is sampled daily at ~1:30 pm local time  
116 along the Aqua satellite orbit track. Also shown are contributions to the total AOD in the model from accumulation  
117 mode sea salt (SSa), coarse mode sea salt (SSc), SNA, BC, organic carbon (OC), and dust. Model AODs in the  
118 simulation “fixedCWC” (**Table 1**) are shown in the bottom panels. In general, the model underestimates AODs over  
119 the WNAO during Feb.-Mar. 2020, with improved model performances along the south/east U.S. coast in March. The  
120 former is likely ascribed to underestimated sea salt emissions because of MERRA-2’s tendency to underestimate ocean  
121 surface winds (Carvalho, 2019) and coarse model grid resolution (Weng et al., 2020). The spatial variation of MODIS  
122 AOD from the Midwest U.S. to the WNAO shows different patterns between Feb. and Mar. In Feb., MODIS observed  
123 high AODs over the Midwest U.S., a decreasing trend towards the South/East U.S. Coast, and high AODs over the  
124 WNAO. The model captures this spatial pattern but the magnitude of AOD variations is much smaller than observed  
125 by MODIS. The spatial distribution of model simulated speciated AODs (**Fig. S3**) suggest that SNA aerosols over the  
126 Midwest U.S. and coarse-mode sea salt over the WNAO are mainly responsible for this pattern in Feb. In Mar., MODIS  
127 observed higher AODs in South/East U.S. Coast and over the WNAO compared to Feb. Such increases are also  
128 captured by the model, which attributes the higher AODs to substantially increased OC and, to a lesser extent, more  
129 SNA over the Midwest U.S. and coarse-mode sea salt over the WNAO. The low bias in AOD over the western U.S.  
130 in the model is likely due to missing anthropogenic or BB emissions for the region, as the “fixedCWC” simulation  
131 with slower wet scavenging does not remove this model bias. The latter simulation does yield higher AODs over the  
132 WNAO, closer to the MODIS values. However, this could be a result of compensating effects between inefficient  
133 aerosol wet scavenging and low sea salt emissions over the ocean. Model simulated AODs over the WNAO are  
134 dominated by coarse-mode sea salt, SNA, OC, and accumulation-mode sea salt, with negligible contributions from  
135 BC and dust.

136 **Fig. S4** shows the same plots as **Fig. S3**, but for the months of Aug. and Sep., respectively, 2020. In Aug., MODIS  
137 observed much higher AODs over the western, southwestern, southeastern U.S., and WNAO, relative to the winter  
138 months. The model reproduces the general spatial distribution but again underestimates AODs over the remote Atlantic  
139 Ocean. The distribution of model speciated AODs suggests that OC explains most of the AOD spatial variation while  
140 SNA also makes an important contribution. In September, MODIS observed even higher AODs over the western U.S.  
141 coast ( $> 0.5$ ), Midwest U.S., and WNAO. The model captures this month-to-month change in AODs very well and  
142 attributes it to large increases in OC as well as coarse-mode sea salt aerosols. As expected, SNA AOD decreases from  
143 Aug. to Sep., reflecting the seasonal reduction in secondary production of SNA aerosols. In summer 2020, extensive  
144 wildfires occurred in the western and southeastern U.S. (section 4.4). In particular, the August Complex “Gigafire” in  
145 mid-August 2020 and the California Creek fire in early September 2020 are among the most intensive fire events in  
146 California. Primary organic aerosols and SOA from oxidation of VOCs emitted by these fires cause substantial  
147 increases in AOD over both the fire emission source region and along the smoke transport pathway towards the  
148 Midwest, northeast U.S., and WNAO, as observed by MODIS and simulated by the model. The generally much higher

149 AODs in summer relative to winter are mainly due to the much larger contributions from these smoke organic aerosols.  
150 The model AOD low bias over the WNAO in Aug. appears to be at least partly due to underestimate of sea salt  
151 emissions, which are lower than those for Feb., Mar., and Sep. In addition, BC from the wildfires makes non-negligible  
152 contributions to summertime AOD over the western and Midwest U.S., in contrast to the wintertime. Model dust AOD  
153 distributions indicate transport of dust from tropical eastern Atlantic and North Africa to the WNAO region during the  
154 summer months, especially Aug. 2020, in agreement with MODIS AOD observations. Using MERRA-2 CWC for  
155 stratiform precipitation scavenging of aerosol in the standard model has little effects on model simulated AOD in  
156 Aug.-Sep., when compared to those from the “fixedCWC” simulation (bottom panels, **Fig. S4**). This is due to the  
157 dominant role of convective (versus stratiform) precipitation in scavenging aerosols during summer.

158

## 159 **References**

- 160 Appel, K. W., Foley, K. M., Bash, J. O., Pinder, R. W., Dennis, R. L., Allen, D. J., and Pickering, K.: A multi-resolution  
161 assessment of the Community Multiscale Air Quality (CMAQ) model v4.7 wet deposition estimates for 2002–  
162 2006, *Geosci. Model Dev.*, 4, 357–371, <https://doi.org/10.5194/gmd-4-357-2011>, 2011.
- 163 Breider, T.J., L.J. Mickley, D.J. Jacob, C. Ge, J. Wang, M.P. Sulprizio, B. Croft, D.A. Ridley, J.R. McConnell, S.  
164 Sharma, L. Husain, V.A. Dutkiewicz, K. Eleftheriadis, H. Skov, and P.K. Hopke, Multi-decadal trends in aerosol  
165 radiative forcing over the Arctic: contribution of changes in anthropogenic aerosol to Arctic warming since 1980, *J.*  
166 *Geophys. Res.*, 122(6), 3573–3594, doi:10.1002/2016JD025321, 2017.
- 167 Carvalho, D.: An Assessment of NASA’s GMAO MERRA-2 Reanalysis Surface Winds, *J. Climate*, 32(23), 8261–  
168 8281, doi:10.1175/JCLI-D-19-0199.1, 2019.
- 169 Corral, A. F., Dadashazar, H., Stahl, C., Edwards, E.-L., Zuidema, P., and Sorooshian, A.: Source Apportionment of  
170 Aerosol at a Coastal Site and Relationships with Precipitation Chemistry: A Case Study over the Southeast United  
171 States, *Atmosphere*, 11, 1212, <https://doi.org/10.3390/atmos11111212>, 2020.
- 172 Corral, A. F., Braun, R. A., Cairns, B., Gorrooh, V. A., Liu, H., Ma, L., et al.: An overview of atmospheric features over  
173 the Western North Atlantic Ocean and North American East Coast – Part 1: Analysis of aerosols, gases, and wet  
174 deposition chemistry. *Journal of Geophysical Research: Atmospheres*, 126, e2020JD032592.  
175 <https://doi.org/10.1029/2020JD032592>, 2021.
- 176 Gartman, N.: Quality Assurance Report National Atmospheric  
177 Deposition Program 2016, [https://nadp.slh.wisc.edu/wp-content/uploads/2021/04/cal\\_qar\\_2016.pdf](https://nadp.slh.wisc.edu/wp-content/uploads/2021/04/cal_qar_2016.pdf), 2017.
- 178 Guenther, A. B., Jiang, X., Heald, C. L., Sakulyanontvittaya, T., Duhl, T., Emmons, L. K., and Wang, X.: The Model  
179 of Emissions of Gases and Aerosols from Nature version 2.1 (MEGAN2.1): an extended and updated framework  
180 for modeling biogenic emissions, *Geosci. Model Dev.*, 5, 1471–1492, <https://doi.org/10.5194/gmd-5-1471-2012>,  
2012.
- 181 Lana, A., et al.: An updated climatology of surface dimethylsulfide concentrations and emission fluxes in the global  
182 ocean, *Global Biogeochem. Cycles*, 25, GB1004, doi:10.1029/2010GB003850, 2011.
- 183 Li, M., Zhang, Q., Streets, D. G., He, K. B., Cheng, Y. F., Emmons, L. K., et al.: Mapping Asian anthropogenic  
184 emissions of non-methane volatile organic compounds to multiple chemical mechanisms. *Atmospheric Chemistry*  
185 *and Physics*, 14, 5617–5638. <https://doi.org/10.5194/acp-14-5617-2014>, 2014.

186 Liu, Z., J. Kar, S. Zeng, J. Tackett, M. Vaughan, M. Avery, J. Pelon, B. Getzewich, K.-P. Lee, B. Magill, A. Omar, P.  
187 Luckner, C. Trepte, and D. Winker: Discriminating Between Clouds and Aerosols in the CALIOP Version 4.1 Data  
188 Products, *Atmos. Meas. Tech.*, **12**, 703–734, <https://doi.org/10.5194/amt-12-703-2019>, 2019.

189 Murray, L. T., Jacob, D. J., Logan, J. A., Hudman, R. C., and Koshak, W. J.: Optimized regional and interannual  
190 variability of lightning in a global chemical transport model constrained by LIS/OTD satellite data, *J. Geophys.*  
191 *Res.*, **117**, D20307, doi:10.1029/2012JD017934, 2012.

192 Philip, S., Marin, R. V., Pierce, J. R., Jimenez, J. L., Zhang, Q., Canagaratna, M. R., Spracklen, D. V., Nowlan, C. R.,  
193 Lamsal, L. N., Cooper, M. J., and Krotkov, N. A., Spatially and seasonally resolved estimate of the ratio of organic  
194 mass to organic carbon, *Atmos. Environ.*, **87**, 34-40, <http://dx.doi.org/10.1016/j.atmosenv.2013.11.065>, 2014.

195 Stettler, M. E. J., Eastham, S., Barrett, S. R. H.: Air quality and public health impacts of UK airports. Part I: Emissions.  
196 *Atmospheric Environment*, **45**(31), 5415–5424. <https://doi.org/10.1016/j.atmosenv.2011.07.012>, 2011.

197 Tackett, J. L., Winker, D. M., Getzewich, B. J., Vaughan, M. A., Young, S. A., and Kar, J.: CALIPSO lidar level 3  
198 aerosol profile product: Version 3 algorithm design. *Atmospheric Measurement Techniques*, **11**(7), 4129–4152.  
199 <https://doi.org/10.5194/amt-11-4129-2018>, 2018.

200 Travis, K. R., Jacob, D. J., Fisher, J. A., Kim, P. S., Marais, E. A., Zhu, L., et al.: Why do models overestimate surface  
201 ozone in the Southeast United States? *Atmos. Chem. Phys.*, **16**, 13,561–13,577. [https://doi.org/10.5194/acp-16-](https://doi.org/10.5194/acp-16-13561-2016)  
202 [13561-2016](https://doi.org/10.5194/acp-16-13561-2016), 2016.

203 Vestreng, V., Mareckova, K., Kakareka, S., Malchykhina, A., and Kukharchyk, T., Inventory Review 2007; Emission  
204 Data Reported to LRTAP Convention and NEC Directive, *MSC-W Technical Report 1/07*, The Norwegian  
205 Meteorological Institute, Oslo, Norway, 2007. [https://emep.int/publ/reports/2007/emep\\_technical\\_1\\_2007.pdf](https://emep.int/publ/reports/2007/emep_technical_1_2007.pdf)

206 Weng, H.-J., Lin, J.-T. \*, Martin, R., Millet, D. B., Jaeglé, L., Ridley, D., Keller, C., Li, C., Du, M.-X., and Meng, J.,  
207 Global high-resolution emissions of soil NO<sub>x</sub>, sea salt aerosols, and biogenic volatile organic compounds,  
208 *Scientific Data*, **7**, 148, doi:10.1038/s41597-020-0488-5, 2020.

209 Winker, D. M., Tackett, J. L., Getzewich, B. J., Liu, Z., Vaughan, M. A., and Rogers, R. R.: The global 3-D distribution  
210 of tropospheric aerosols as characterized by CALIOP, *Atmos. Chem. Phys.*, **13**, 3345–3361,  
211 <https://doi.org/10.5194/acp-13-3345-2013>, 2013. Yu, F., A. Nair, and G. Luo: Long term trend of gaseous ammonia  
212 in US: Modeling and comparison with observations, *Journal of Geophysical Research: Atmospheres*, **123**, 8315-  
213 8325, 2018.

214

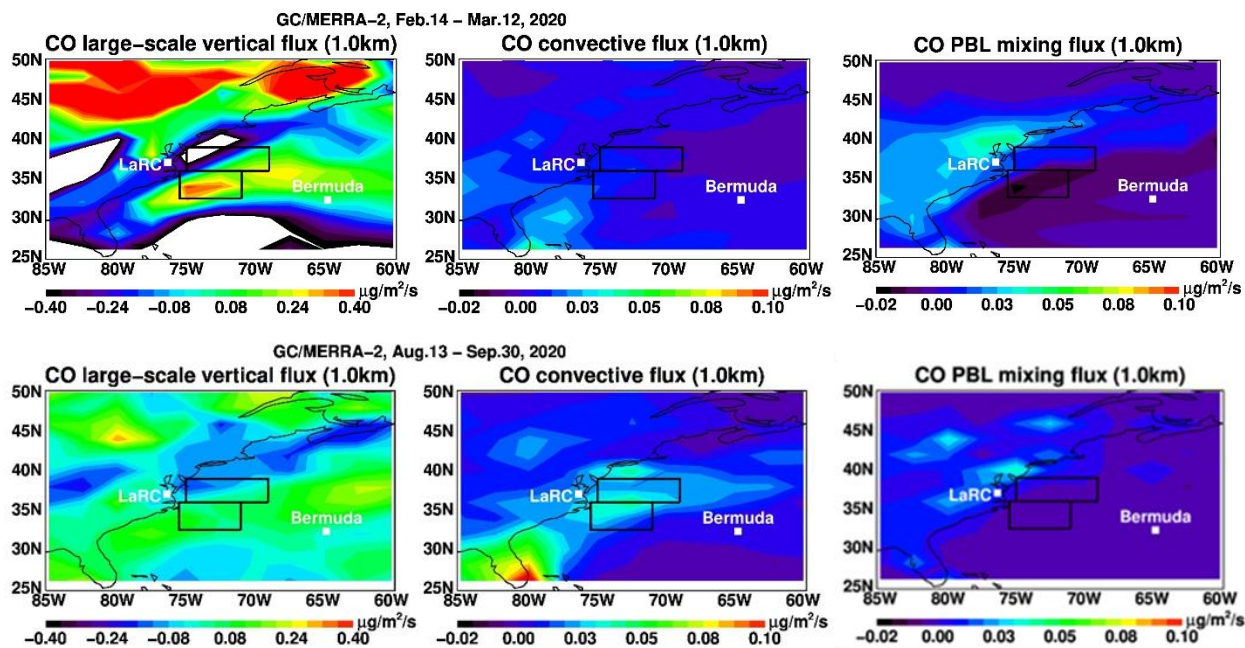

217  
 218 **Figure S1a.** Model simulated large-scale (resolved) vertical fluxes, convective fluxes, and PBL turbulent mixing fluxes of CO at  
 219 the altitude of 1.0 km, averaged over the periods of Feb. 14 - Mar. 12 (upper row) and Aug. 13 – Sep. 30 (lower row), 2020,  
 220 respectively. White areas indicate saturated values. The two rectangular boxes denote major flight areas (see “N” and “S” in Fig.  
 221 1).

222

223



224  
225  
226

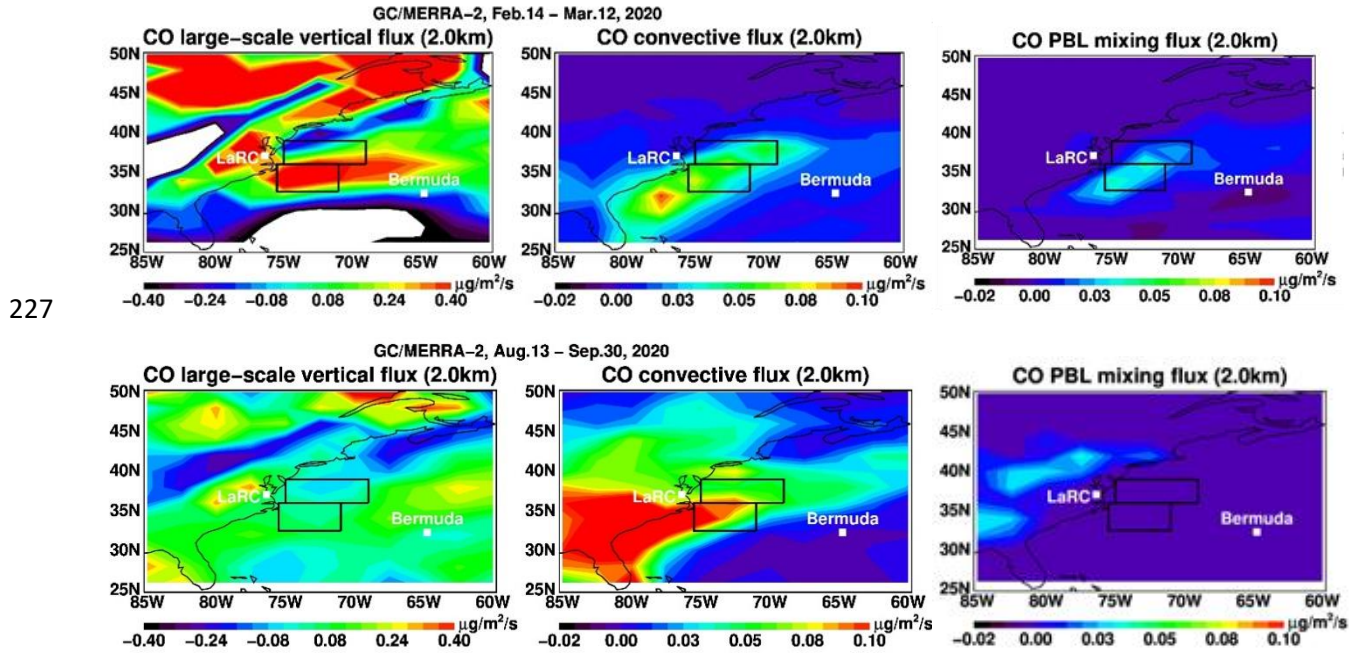

228  
229  
230

**Figure S1b.** Same as Fig. S1a, but for the altitude of 2.0 km. White areas indicate saturated values.

231

232

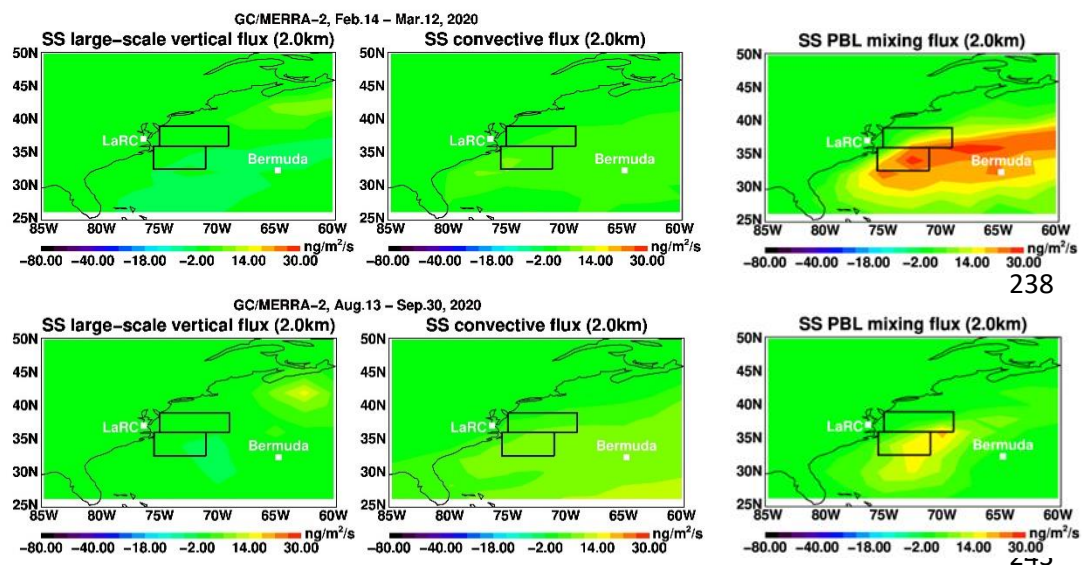

244

245 **Figure S1c.** Same as Fig. S1a, but for sea salt at the altitude of 2.0 km.

246

247

248

249

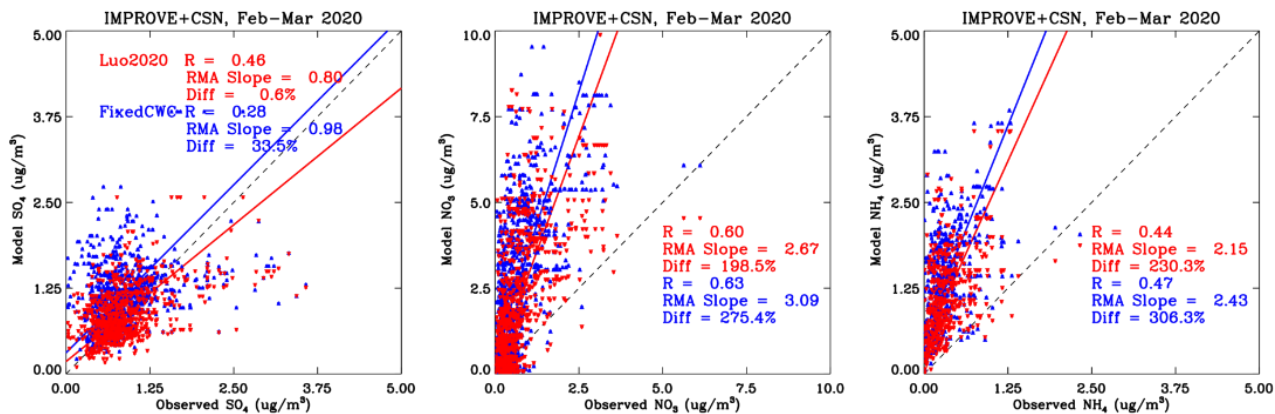

250

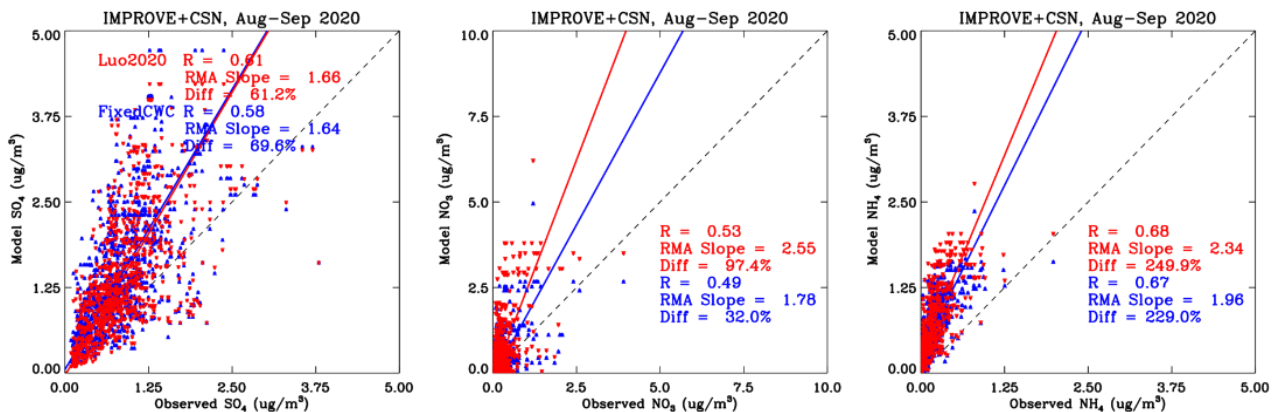

251

252 **Figure S2.** Scatterplots of model daily mean surface concentrations of SO<sub>4</sub>, NO<sub>3</sub>, and NH<sub>4</sub> versus corresponding IMPROVE and  
 253 CSN observations made at near-coast eastern U.S. sites during Feb.-Mar. (upper panels) and Aug.-Sep. (lower panels) 2020,  
 254 respectively. Model results from simulations with either a fixed cloud water content (blue; Table 1) or MERRA-2 cloud water  
 255 content (red; Table 1) are shown. Solid lines are the linear regression lines obtained using the reduced-major-axis (RMA) method.  
 256 Dashed lines are 1:1 line. Legends show calculated correlation coefficient, RMA slope (if R > 0.1), and overall difference (%)  
 257 between model results and observations, i.e.,  $(\Sigma_{model} - \Sigma_{observation}) / \Sigma_{observation} \times 100\%$ .

258

259  
260  
261

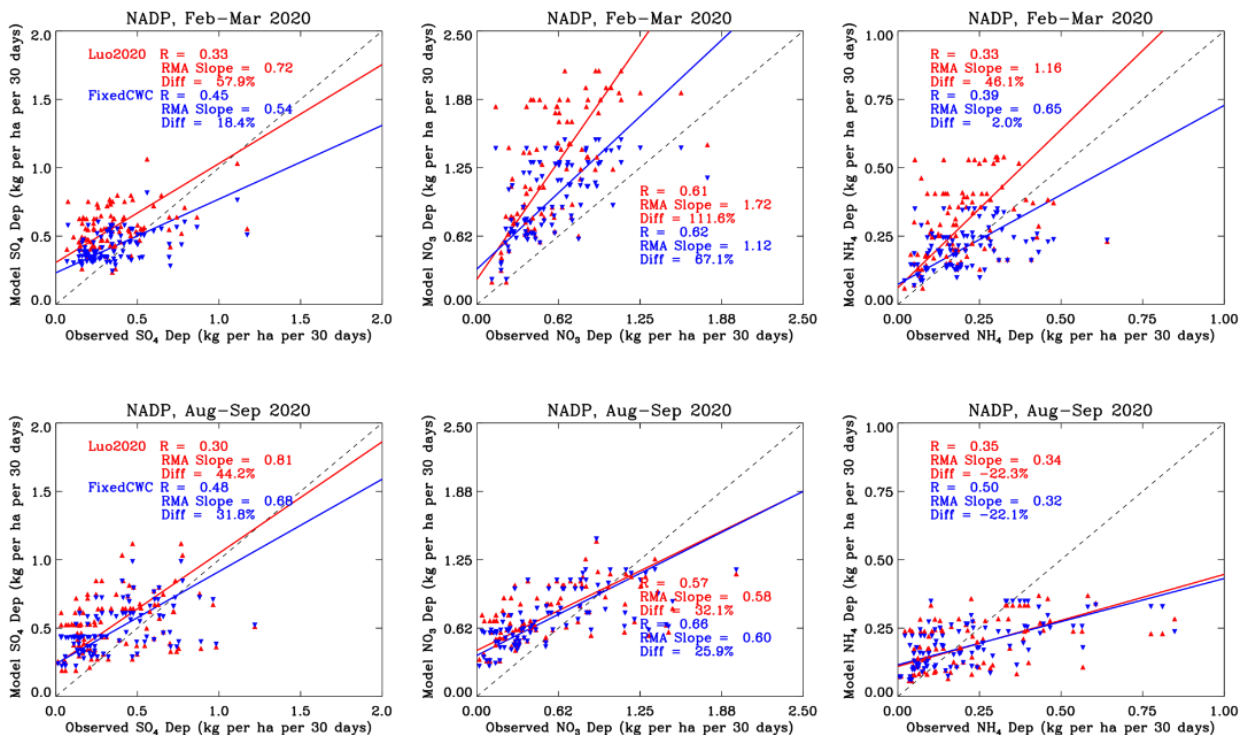

262

263

264 **Figure S3.** Scatterplots of model monthly mean wet deposition fluxes of SO<sub>4</sub>+SO<sub>2</sub>, NO<sub>3</sub>+HNO<sub>3</sub>, and NH<sub>4</sub>+NH<sub>3</sub> versus  
265 corresponding NADP observations made at near-coast eastern U.S. sites (>100 sites in the states of NY, CT, VA, MA, ME, GA,  
266 PA, DC, FL, NC, and SC) during Feb.-Mar. (upper panels) and Aug.-Sep. (lower panels) 2020, respectively. Deposition mass fluxes  
267 of SO<sub>2</sub>, HNO<sub>3</sub>, and NH<sub>3</sub> are converted to SO<sub>4</sub>, NO<sub>3</sub>, and NH<sub>3</sub> mass fluxes of equivalent mole amounts. Monthly mean model results  
268 are sampled at the month and location of observations. Each data point in the figure represents a monthly mean value for one single  
269 site. Model results from simulations with either a fixed cloud water content (blue; Table 1) or MERRA-2 cloud water content (red;  
270 Table 1) are shown. Solid lines are the linear regression lines obtained using the reduced-major-axis (RMA) method. Dashed lines  
271 are 1:1 line. Legends show calculated correlation coefficient, RMA slope (if R > 0.1), and overall difference (%) between model  
272 results and observations:  $(\sum_{model} - \sum_{observation}) / \sum_{observation} \times 100\%$ .

273

274  
 275  
 276  
 277  
 278  
 279  
 280  
 281  
 282  
 283  
 284  
 285  
 286  
 287  
 288  
 289  
 290  
 291  
 292  
 293  
 294  
 295  
 296  
 297  
 298

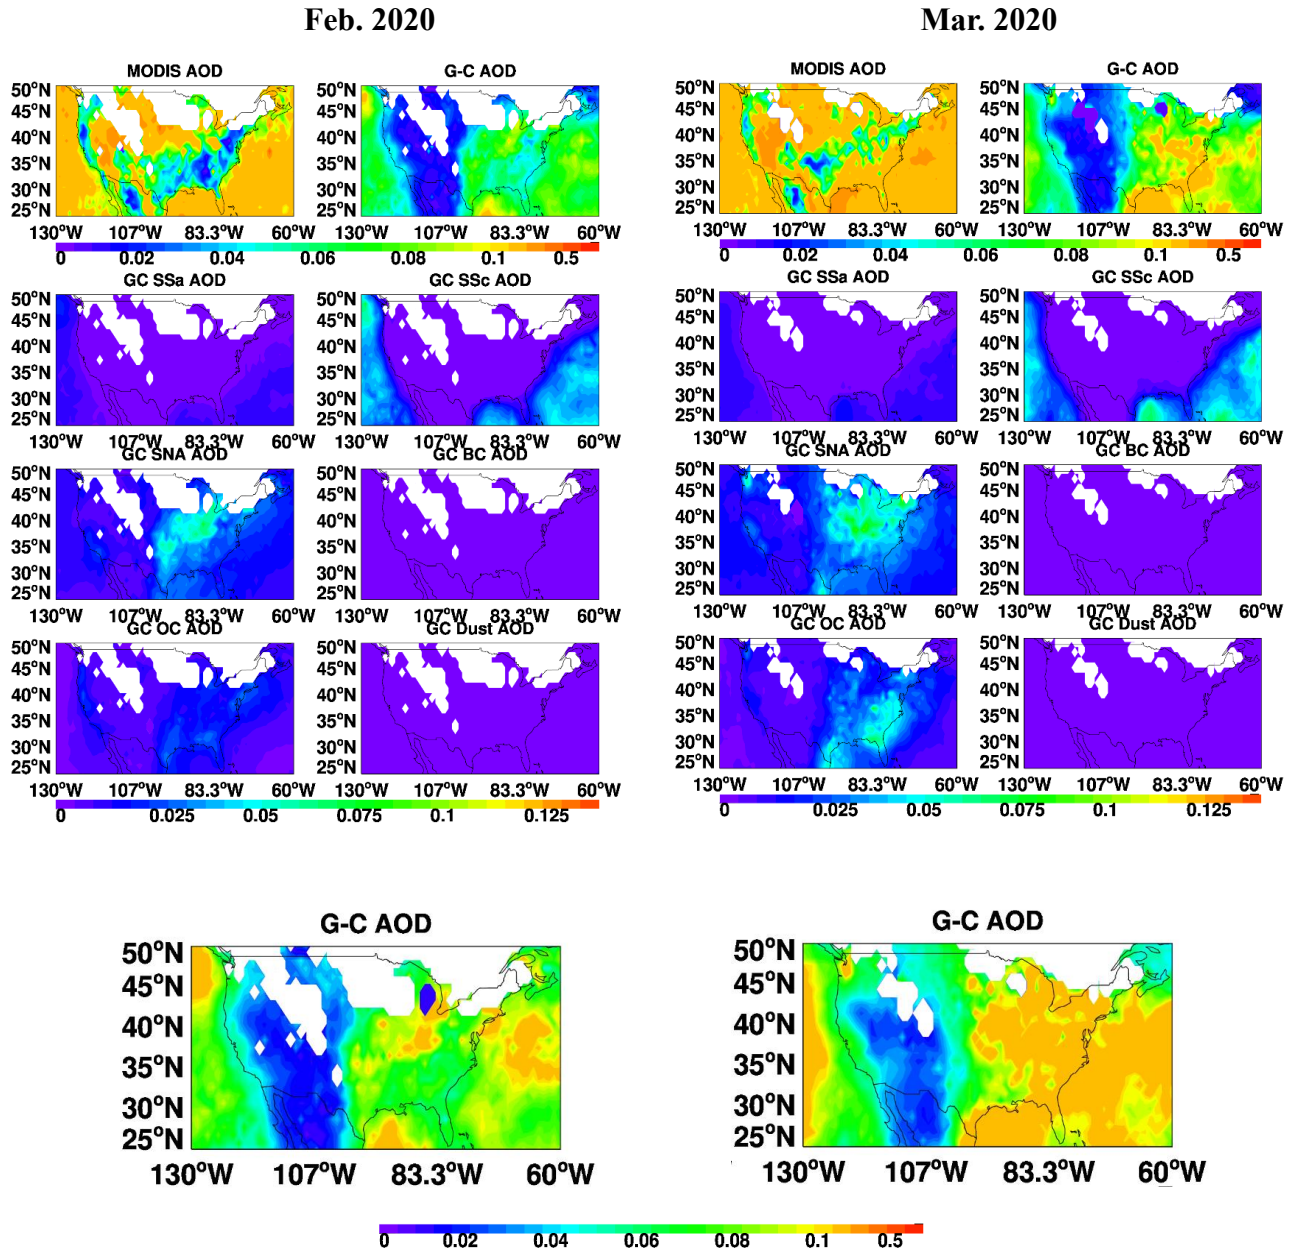

299 **Figure S4.** Evaluation of model monthly mean AODs with MODIS/Aqua retrievals (at 550nm) over North America and North  
 300 Atlantic for Feb. 2020 (left two columns) and Mar. 2020 (right two columns). Model output is sampled daily at 1:30 pm local time  
 301 along the Aqua satellite orbit track. Also shown are contributions to the total AOD in the model from accumulation mode sea salt  
 302 (SSa), coarse mode sea salt (SSc), sulfate-nitrate-ammonium (SNA), black carbon (BC), organic carbon (OC, primary only), and  
 303 dust. Model AODs in the simulation “fixedCWC” (Table 1) are shown in the bottom panels.

304

305  
 306  
 307  
 308  
 309  
 310  
 311  
 312  
 313  
 314  
 315  
 316  
 317  
 318  
 319  
 320  
 321  
 322  
 323  
 324  
 325  
 326  
 327  
 328  
 329  
 330  
 331

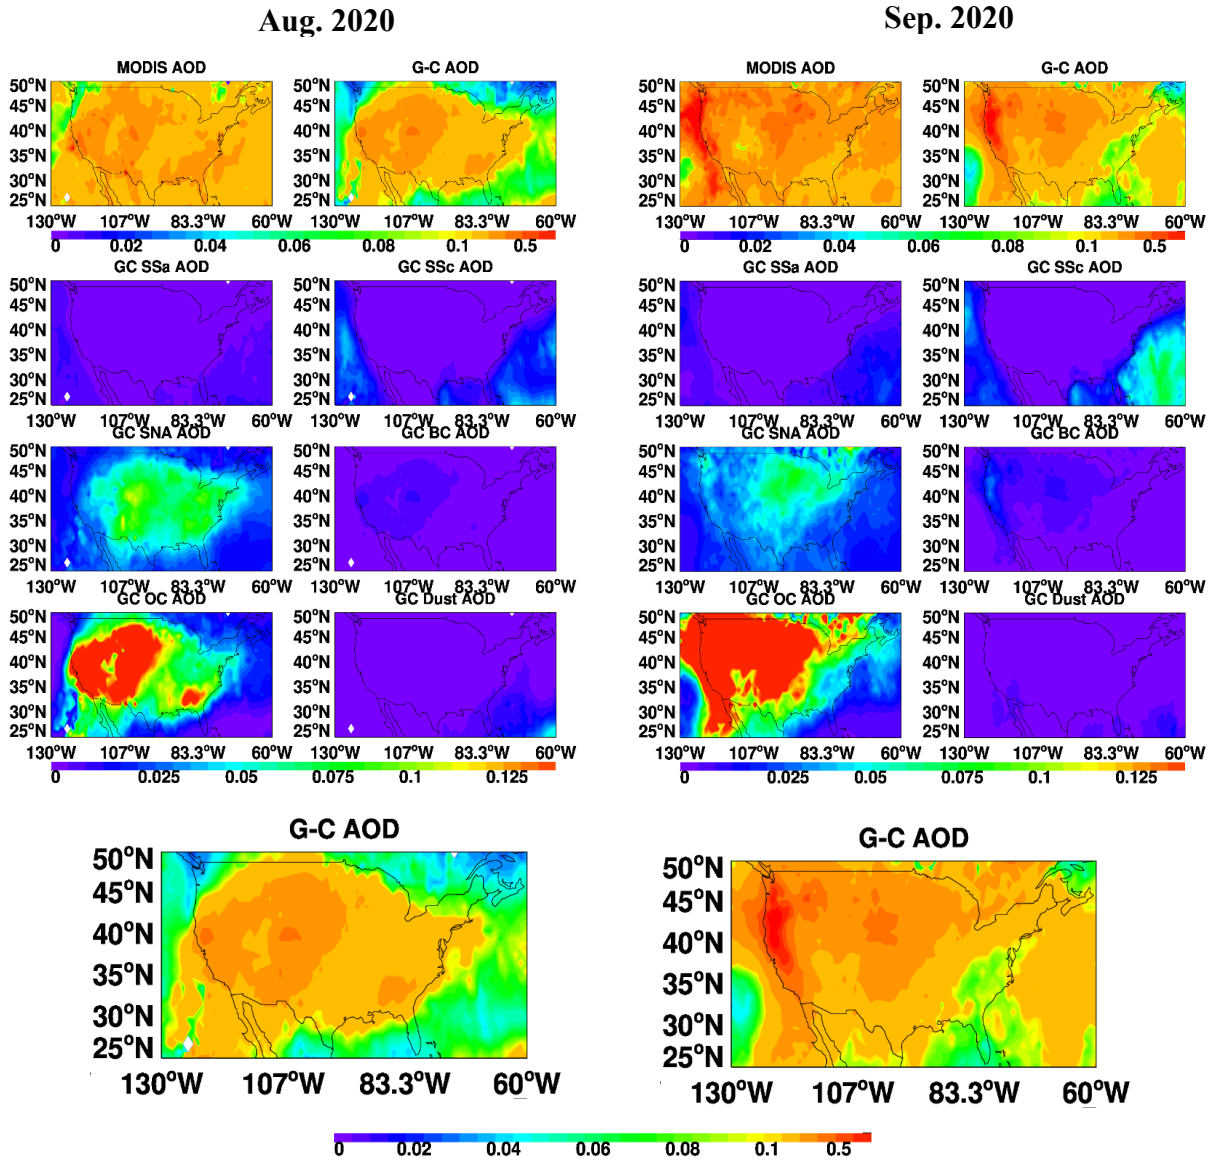

Figure S5. Same as Fig. S4, but for Aug. 2020 (left two columns) and Sep. 2020 (right two columns).

332  
333  
334  
335  
336  
337  
338  
339  
340  
341  
342  
343  
344  
345  
346  
347  
348  
349

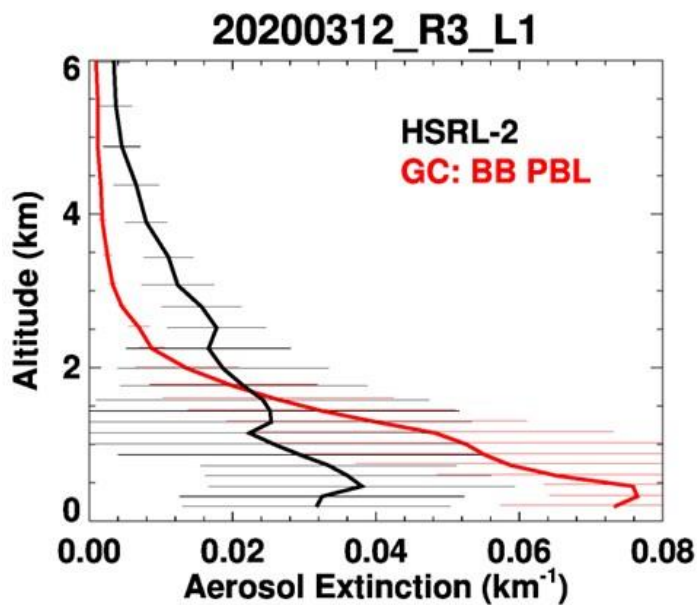

**Figure S6.** Comparisons of model aerosol extinctions (550nm) with aircraft HSRL-2 lidar measurements (532nm) averaged over the morning flight on March 12, 2020. Biomass burning emissions are injected into the planetary boundary layer (“BB PBL”) in the model (see Table 1). Hourly model output was sampled at the time and location of lidar measurements. Horizontal lines denote +/- standard deviations of observed and simulated aerosol extinctions at model vertical levels.

350  
351  
352  
353  
354  
355  
356  
357  
358  
359  
360  
361  
362  
363  
364  
365  
366  
367  
368  
369  
370  
371  
372  
373  
374  
375  
376  
377

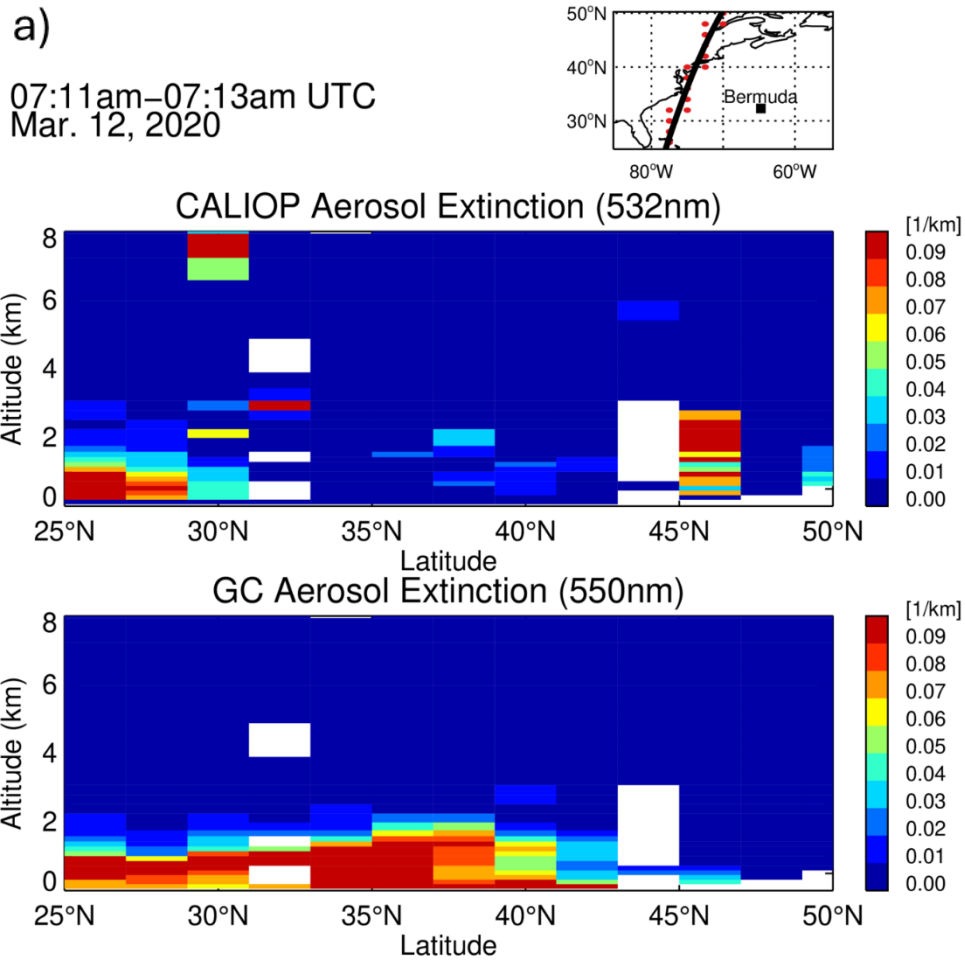

**Figure S7. (a)** Latitude-height cross-section of aerosol extinctions measured by CALIOP (532 nm) over the WNAO at 07:11-07:13am UTC, Mar. 12, 2020, compared to that of model aerosol extinctions (550 nm). Model output is sampled at ~1:30am LT. **(b)** Left column: Latitude-height cross-section of model speciated aerosol extinctions (550 nm) along the CALIPSO orbit track shown in (a). Right column: same as left column, but for accumulated sea salt (SSa), coarse-mode sea salt (SSc), MERRA-2 RH(%), MERRA-2 cloud fraction, and MERRA-2 effective cloud extinction (i.e., cloud extinction multiplied by cloud fraction to the power of 3/2; Liu et al., 2009). (to be cont'd)



378

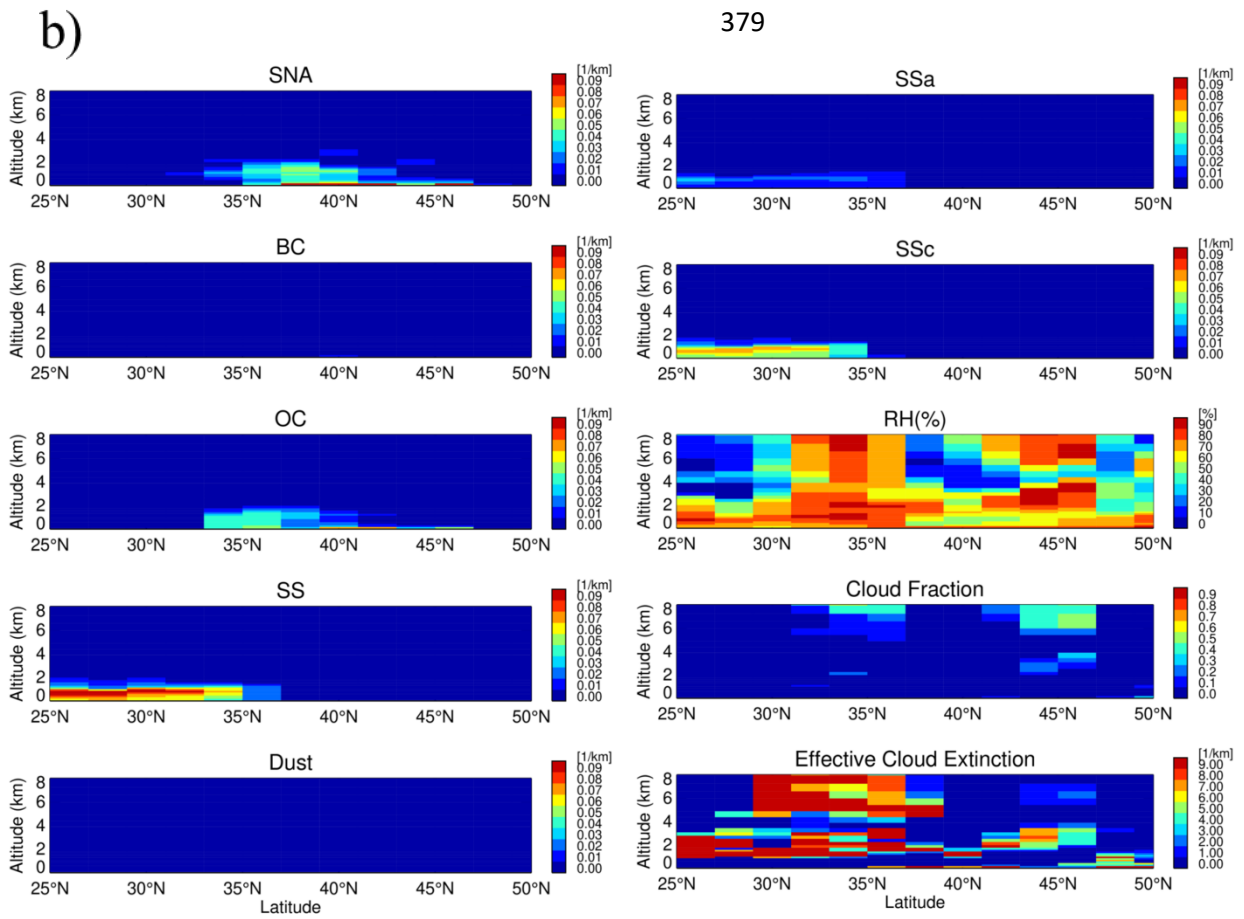

380

381 **Figure S7.** (cont'd)

382

383  
384  
385

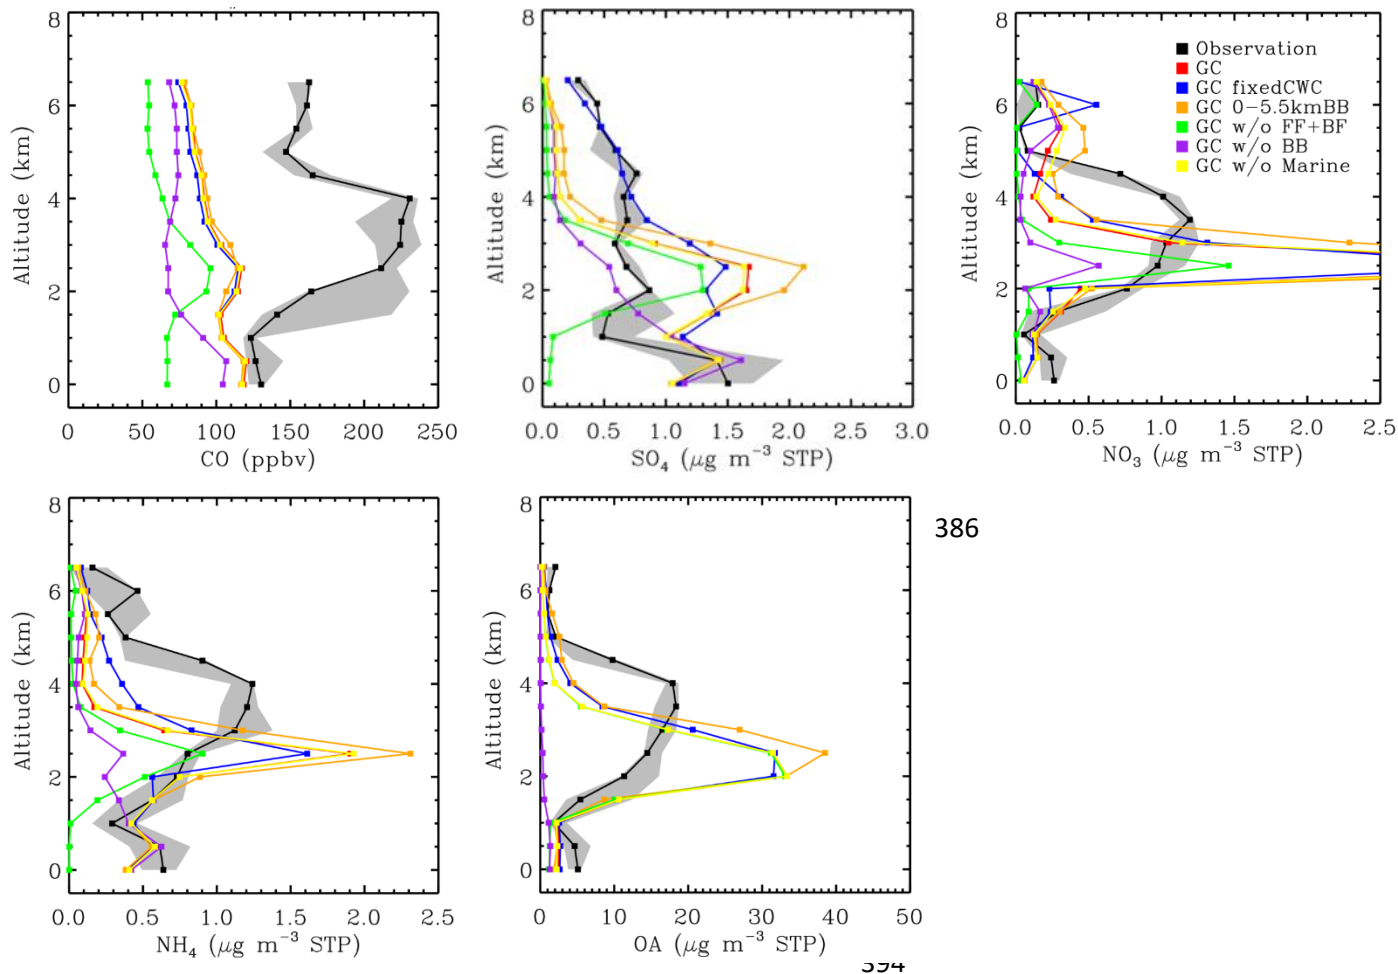

395  
396  
397  
398  
399  
400  
401  
402  
403

**Figure S8.** Comparison of model simulated (red) vertical profiles of CO (ppbv), sulfate, nitrate, ammonium, and organic aerosol (OA;  $\mu\text{g m}^{-3}$  STP) mixing ratios with Falcon aircraft measurements (black) on Sep. 23, 2020. Also shown are model results from simulations (Table 1) with (1) a fixed value for cloud water content used in aerosol scavenging (“fixedCWC”), (2) biomass burning emissions injected to the 0-5.5km altitudes, (3) fossil fuel and biofuel emissions turned off, (4) biomass burning emissions turned off, or (5) marine emissions turned off, respectively. An OA/OC ratio of 2.1 (Philip et al., 2014) is used to convert simulated OC to compare with AMS OA measurements. Hourly model output was sampled at the time and location of aircraft measurements. Values (500m-binned) are medians. Gray shaded areas indicate the ranges of 25<sup>th</sup> – 75<sup>th</sup> percentiles for the observations.
